# Supplementary material
Source: PubMed Central journal article supplement (PMC3842764)
Supplement: supp_btt565_GPCROntology_SupplementaryInformation.pdf [file supp_btt565_GPCROntology_SupplementaryInformation.pdf]

Supplementary Information

GPCR ontology: development and application of a G protein-coupled receptor pharmacology knowledge framework

Magdalena J. Przydzial<sup>1</sup>, Barun Bhatarai<sup>1</sup>, Amar Koleti<sup>1</sup>, Uma Vempati<sup>1</sup>, and Stephan C. Schürer<sup>\*,1,2</sup>

<sup>1</sup>Center for Computational Science, University of Miami, Miami, FL 33136, USA

<sup>2</sup>Department of Molecular and Cellular Pharmacology, Miller School of Medicine, University of Miami, Miami, FL 33136 FL, USA.

\*contact: ssschurer@med.miami.edu

Supplementary Figure 1. Detailed view on parts of the GPCR ontology pertaining to the receptor.

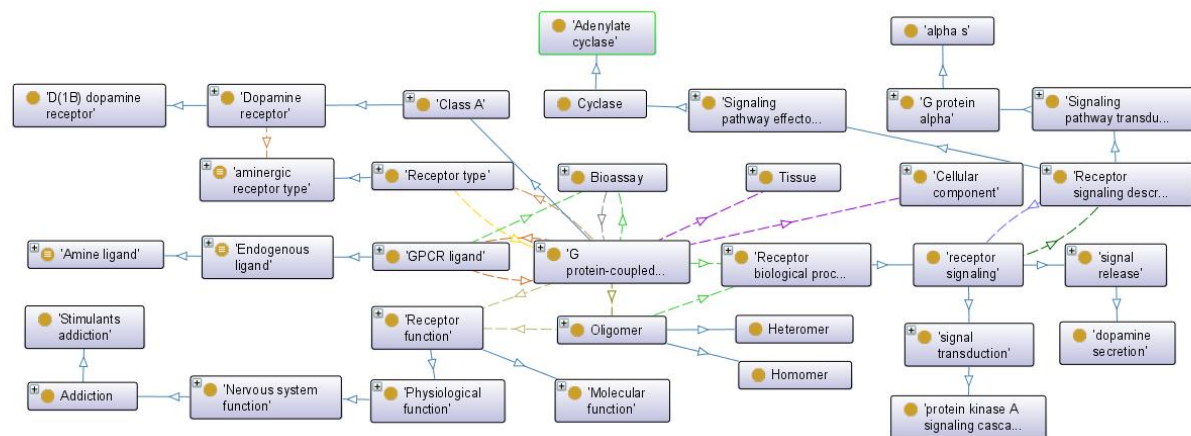

- 'has attribute'(Subclass some)
- 'is attribute of'(Subclass some)
- 'is located in'(Subclass some)
- 'is part of'(Subclass some)
- 'is participant in'(Subclass some)
- binds\_to(Subclass some)
- has individual
- has subclass
- has\_endpoint(Subclass some)
- has\_function(Subclass some)
- has\_receptor\_type(Subclass some)
- has\_target(Subclass some)
- is\_receptor\_type\_of(Subclass some)

Supplemental Figure 2. Detailed view on parts of the GPCR ontology pertaining to the ligand.

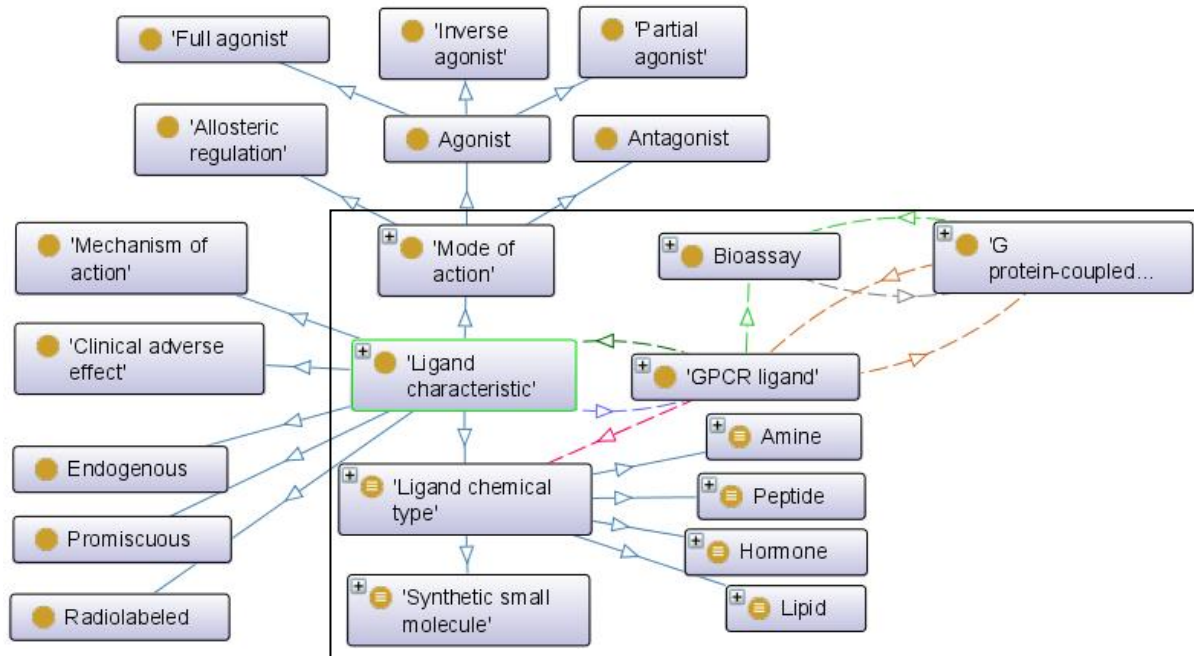

- 'has attribute'(Subclass some)
- 'is attribute of'(Subclass some)
- 'is located in'(Subclass some)
- 'is part of'(Subclass some)
- 'is participant in'(Subclass some)
- binds\_to(Subclass some)
- has individual
- has subclass
- has\_endpoint(Subclass some)
- has\_function(Subclass some)
- has\_ligand\_type(Subclass some)
- has\_receptor\_type(Subclass some)
- has\_target(Subclass some)
- is\_receptor\_type\_of(Subclass some)

**Supplemental Figure 3.** Modeling of the relationship of GPCR and GPCR ligand and receptor- and ligand chemical type; aminergic receptor binds to amine ligand; 5-hydroxytryptamine receptor is inferred as subclass of aminergic receptor.

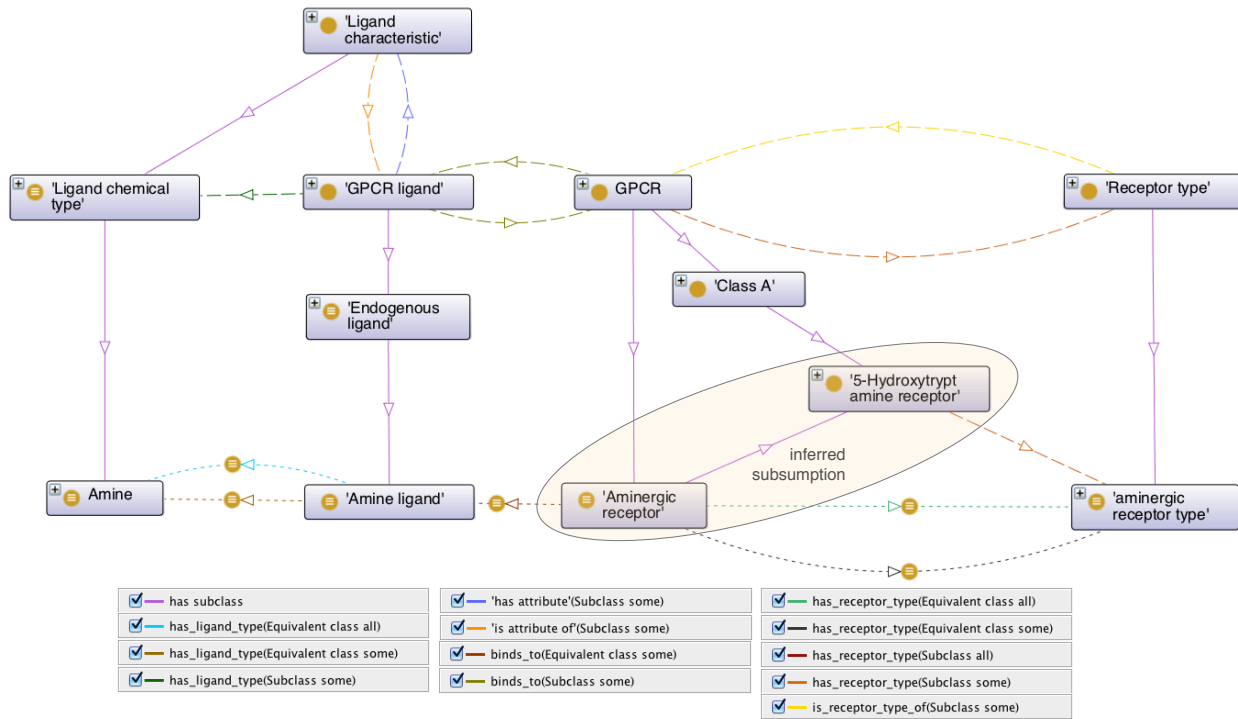

**Supplemental Figure 4.** Illustration of asserted versus inferred model of an excerpt of the ontology. Aminergic, lipidergic, hormonergic, and peptidergic receptor sub-classes are inferred; example receptor subclasses of aminergic receptor are shown.

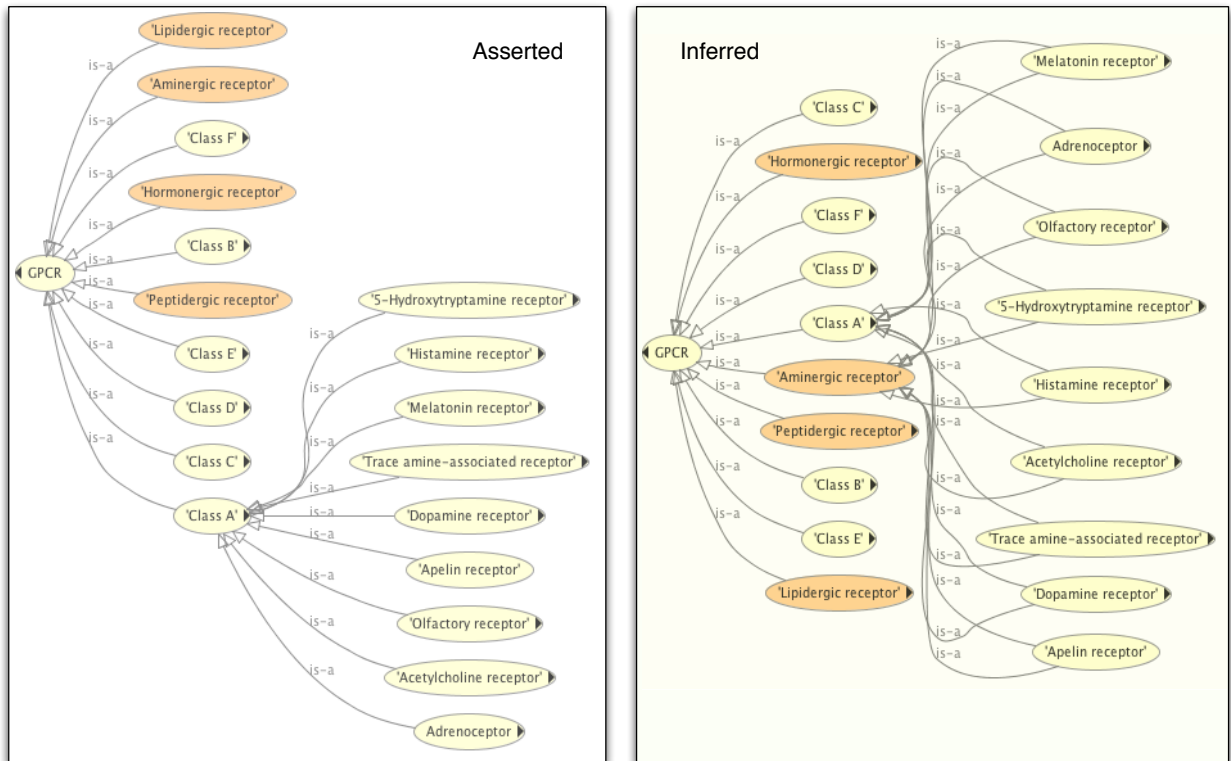

**Supplementary Figure 5.** Compound promiscuity by GPCR type. For each compound the Promiscuity Index vs. number of tested assays is depicted. Color indicates the number of assays in which a compound was active (red, low number; blue, high number of assays tested). There are 17,090 data points for aminergic GPCR type; 15,459 and 15,568 data points for peptidergic and lipidergic GPCR types, respectively.

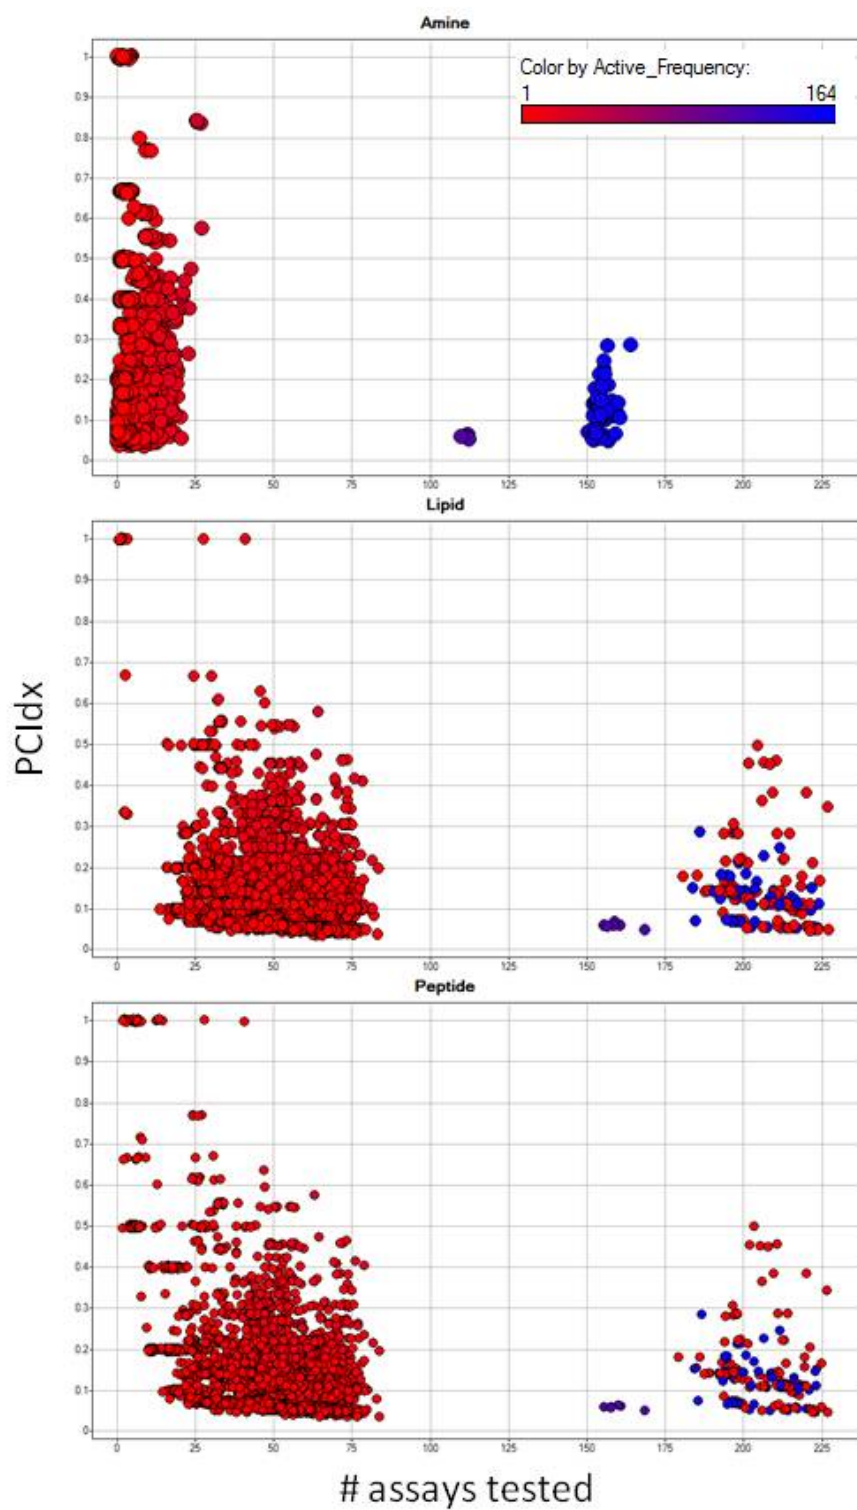

**Supplementary Table 1.** An example of details captured during assay annotation.

|                                         |                                                                |                                                             |                                                             |
|-----------------------------------------|----------------------------------------------------------------|-------------------------------------------------------------|-------------------------------------------------------------|
| Screening campaign                      | "Positive allosteric modulators of the M5 muscarinic receptor" |                                                             |                                                             |
| AID                                     | 2665                                                           | 2194                                                        | 2206                                                        |
| Assay Stage                             | Primary                                                        | Confirmatory                                                | Secondary Assay                                             |
| Relationship                            | has confirmatory assay 2194<br>has secondary assay 2206        | has primary assay 2665                                      | has primary assay 2665                                      |
| Assay Measurement<br>Throughput Quality | Single concentration single<br>measurement (e.g. 1x%Inh)       | Concentration response multiple<br>replicates (e.g. 3xIC50) | Concentration response multiple<br>replicates (e.g. 3xIC50) |
| Endpoint                                | Maximal response                                               | EC50                                                        | EC50                                                        |
| Format                                  | Cell-based format                                              | Biochemical format                                          | Cell-based format                                           |
| Design                                  | Calcium redistribution                                         | Radioligand binding                                         | Calcium redistribution                                      |
| Detection Technology                    | Fluorescence intensity                                         | Scintillation counting, filter assay                        | Fluorescence intensity                                      |
| Measured Entity                         | Calcium flux                                                   | [3H]-NMS radioactivity                                      | Calcium flux                                                |
| Meta target                             | Human M5                                                       | Human M5                                                    | Rat M1                                                      |
| GPCR Family                             | Muscarinic                                                     | Muscarinic                                                  | Muscarinic                                                  |
| Oligomer Component                      | n/a                                                            | n/a                                                         | n/a                                                         |
| Receptor Type                           | Aminergic                                                      | Aminergic                                                   | Aminergic                                                   |
| Receptor Protein ID                     | P08912                                                         | P08912                                                      | P08482                                                      |
| Primary Transduction<br>Mechanism       | G <sub>q</sub> /G <sub>11</sub>                                | G <sub>q</sub> /G <sub>11</sub>                             | G <sub>q</sub> /G <sub>11</sub>                             |
| Primary Effector                        | Phospholipase C stimulation                                    | Phospholipase C stimulation                                 | Phospholipase C stimulation                                 |
| Physiological Function                  | Bronchoconstriction, automaticity of<br>the heart, etc.        | Bronchoconstriction, automaticity of<br>the heart, etc.     | Modulation of dopaminergic<br>neurotransmission, etc.       |
| Tissue Distribution                     | CNS, heart, etc.                                               | CNS, heart, etc.                                            | CNS, esophagus, etc.                                        |

**Supplementary Table 2.** Target category of the 407 annotated PubChem assays. Note, 52 summary assays are not included. The abbreviations used for the proteins are: 5-HT, 5-hydroxytryptamine receptor; AGT, angiotensin II receptor; APJ, apelin receptor; AVPR, arginine vasopressin receptor; CCR, C-C chemokine receptor; DRD, dopamine receptor; FPR, formyl peptide receptor; Gal, galanin receptor; GPR30, G protein-coupled estrogen receptor; KOR, kappa opioid receptor; LH, luteinizing hormone receptor; MCH, melanin-concentrating hormone receptor; mGlu, metabotropic glutamate receptor; M, muscarinic; NPS, neuropeptide S receptor; NPY, neuropeptide Y receptor; NP B/W, neuropeptide B/W receptor; NTS, neurotensin receptor; OX, orexin receptor; OT, oxytocin receptor; PTGE, prostaglandin E receptor; RXFP, relaxin receptor; SIP, sphingosine-1-phosphate receptor; TSH, thyroid stimulating hormone receptor; TRH, thyrotropin-releasing hormone receptor. Cdc42, cell division cycle 42; G<sub>αq</sub>, guanine nucleotide binding protein, alpha subunit, q polypeptide.

|                    |                         | GPCR | G protein | RGS | Biological Process |
|--------------------|-------------------------|------|-----------|-----|--------------------|
| G protein          | <i>Cdc42</i>            |      | 17        |     |                    |
|                    | <i>G<sub>αq</sub></i>   |      | 3         |     |                    |
|                    | <i>GTPases Rac, Rho</i> |      | 14        |     |                    |
| RGSs               |                         |      |           | 33  |                    |
| GPCRs              | <i>5-HT</i>             | 10   |           |     |                    |
|                    | <i>Adrenergic</i>       | 7    |           |     |                    |
|                    | <i>AGT</i>              | 2    |           |     |                    |
|                    | <i>APJ</i>              | 6    |           |     |                    |
|                    | <i>Vasopressin</i>      | 9    |           |     |                    |
|                    | <i>Cannabinoid</i>      | 2    |           |     |                    |
|                    | <i>CCR</i>              | 1    |           |     |                    |
|                    | <i>Opioid</i>           | 27   |           |     |                    |
|                    | <i>DRD</i>              | 12   |           |     |                    |
|                    | <i>FPR</i>              | 17   |           |     |                    |
|                    | <i>GPR30</i>            | 4    |           |     |                    |
|                    | <i>GPR35</i>            | 4    |           |     |                    |
|                    | <i>GPR55</i>            | 4    |           |     |                    |
|                    | <i>Gal</i>              | 6    |           |     |                    |
|                    | <i>LH</i>               | 1    |           |     |                    |
|                    | <i>MCH</i>              | 1    |           |     |                    |
|                    | <i>mGlu</i>             | 15   |           |     |                    |
|                    | <i>M</i>                | 42   |           |     |                    |
|                    | <i>NPS</i>              | 9    |           |     |                    |
|                    | <i>NPY</i>              | 32   |           |     |                    |
|                    | <i>NP B/W</i>           | 2    |           |     |                    |
|                    | <i>NTS</i>              | 1    |           |     |                    |
|                    | <i>OX</i>               | 4    |           |     |                    |
|                    | <i>OT</i>               | 8    |           |     |                    |
|                    | <i>PTGE</i>             | 6    |           |     |                    |
|                    | <i>Relaxin</i>          | 4    |           |     |                    |
| <i>SIP</i>         | 37                      |      |           |     |                    |
| <i>TSH</i>         | 7                       |      |           |     |                    |
| <i>TRH</i>         | 5                       |      |           |     |                    |
| Biological Process | <i>Cell death</i>       |      |           |     | 3                  |
| TOTAL              |                         | 285  | 34        | 33  | 3                  |

**Supplementary Table 3.** Detection technology for GPCR, G protein and RGS target-based assays. HTRF, *homogeneous time resolved fluorescence*; FRET, *fluorescence resonance energy transfer*; TR-FRET, *Time-Resolved FRET*.

|                           | GPCR | G protein | RGS | total |
|---------------------------|------|-----------|-----|-------|
| Chemi-/luminescence       | 28   |           |     | 28    |
| Filter assay              | 9    |           |     | 9     |
| Flow cytometry            | 19   | 31        | 24  | 74    |
| Fluorescence intensity    | 155  | 2         | 5   | 162   |
| Fluorescence polarization |      |           | 3   | 3     |
| FRET                      | 52   |           |     | 52    |
| HTRF                      | 10   |           |     | 10    |
| Lysate based              | 2    |           |     | 2     |
| Thermal shift             |      |           | 1   | 1     |
| TR-FRET                   | 12   | 1         |     | 13    |
| Unspecified               | 1    |           |     | 1     |
| TOTAL                     | 288  | 34        | 33  | 355   |



**Supplementary Table 4.** Measured entity for GPCR, G protein and RGS target-based assays. A molecular substance or process measured in PubChem assays reporting GPCR, G protein and RGS as targets.

|                              | GPCR       | G protein | RGS       | total      |
|------------------------------|------------|-----------|-----------|------------|
| [cAMP]                       | 20         |           |           | 20         |
| [IP1]                        | 4          | 1         |           | 5          |
| Acetylcholine                | 1          |           |           | 1          |
| Arrestin redistribution      | 33         |           |           | 33         |
| ATP                          | 3          |           |           | 3          |
| Brain penetrance             | 1          |           |           | 1          |
| Calcium                      | 72         | 2         | 5         | 79         |
| GTP-fluorescent              | 2          | 30        |           | 32         |
| G <sub>αo</sub> -fluorescent |            |           | 24        | 24         |
| Luciferase                   | 23         |           |           | 23         |
| Membrane potential           | 36         |           | 1         | 37         |
| Peptide-fluorescence         | 13         |           | 3         | 16         |
| Radioactivity                | 11         |           |           | 11         |
| Thallium flux                | 16         |           |           | 16         |
| β-galactosidase              | 16         |           |           | 16         |
| β-lactamase                  | 38         |           |           | 38         |
| <b>TOTAL</b>                 | <b>289</b> | <b>33</b> | <b>33</b> | <b>355</b> |

**Supplementary Table 5.** Endpoints of annotated assays and number of compounds screened per assay. Note, some assays report multiple endpoints. AC<sub>50</sub>, potency, concentration at which compound exhibits half maximal efficacy; B<sub>max</sub>, amount of drug required to saturate a population of receptors; K<sub>d</sub>, dissociation constant; EC<sub>50</sub>, half maximal effective concentration; IC<sub>50</sub>, half maximal inhibitory concentration; K<sub>i</sub>, absolute inhibition constant; T<sub>m</sub>, melting temperature.

|                                        | GPCR | G protein | RGS | total |
|----------------------------------------|------|-----------|-----|-------|
| % Activation                           | 41   | 1         |     | 42    |
| % Inhibition                           | 41   | 3         |     | 44    |
| % Response                             | 12   | 2         | 13  | 27    |
| AC <sub>50</sub>                       | 34   |           | 3   | 37    |
| B <sub>max</sub> , K <sub>d</sub>      |      | 5         |     | 5     |
| EC <sub>50</sub>                       | 80   | 23        | 14  | 117   |
| Fold activation                        | 11   |           |     | 11    |
| IC <sub>50</sub>                       | 49   |           |     | 49    |
| K <sub>i</sub>                         | 7    |           |     | 7     |
| Maximal response                       | 31   |           |     | 31    |
| Raw activity                           | 21   |           | 2   | 23    |
| Response                               | 1    |           |     | 1     |
| T <sub>m</sub>                         |      |           | 1   | 1     |
| Unspecified                            | 5    |           |     | 5     |
| Number of compounds screened per assay |      |           |     |       |
| #cmpds: 0 - 100                        | 143  | 24        | 10  |       |
| #cmpds: 101 - 1000                     | 59   |           | 6   |       |
| #cmpds: 1k - 100k                      | 49   | 6         | 9   |       |
| #cmpds: 100k - n                       | 34   | 4         | 8   |       |

**Supplementary Table 6.** Mechanism of action. The effect of the compound on the GPCRs, RGS, or G protein target as reported in PubChem.

|                       |                    | GPCR | G protein | RGS | total |
|-----------------------|--------------------|------|-----------|-----|-------|
| activation            | <i>allosteric</i>  | 58   |           |     | 58    |
|                       | <i>competitive</i> | 123  | 29        | 28  | 180   |
|                       | <i>unspecified</i> | 94   | 1         | 1   | 96    |
| activation/inhibition |                    | 1    | 1         |     | 2     |
| inhibition            |                    | 12   |           | 4   | 16    |
| saturation binding    |                    |      | 3         |     | 3     |
| TOTAL                 |                    | 288  | 34        | 33  | 355   |

**Supplementary Table 7.** Summary of lead compounds generated for G protein, GPCRs and RGS targets PubChem screening campaigns as reported in NIH MLP Probe Report. (NAM, allosteric agonist; PAM, positive allosteric modulator).

| Target Receptor                                   | Probe Efficacy                                                                                                                                                                                                                                                                                                                                              | Probe SID                             |
|---------------------------------------------------|-------------------------------------------------------------------------------------------------------------------------------------------------------------------------------------------------------------------------------------------------------------------------------------------------------------------------------------------------------------|---------------------------------------|
| Cdc42 activated mutant                            | activator                                                                                                                                                                                                                                                                                                                                                   | 57578338, 57578337, 57578335          |
| Cdc42 wt                                          | inhibitor                                                                                                                                                                                                                                                                                                                                                   | 57578341                              |
| APJ                                               | agonist                                                                                                                                                                                                                                                                                                                                                     | 99361200                              |
| FPR1                                              | antagonist                                                                                                                                                                                                                                                                                                                                                  | 24428139, 24702504                    |
| GPR30                                             | antagonist                                                                                                                                                                                                                                                                                                                                                  | 48409542, 48409616                    |
| GPR35                                             | antagonist                                                                                                                                                                                                                                                                                                                                                  | 99309109, 87544496, 87544499          |
| GPR55                                             | agonist                                                                                                                                                                                                                                                                                                                                                     | 87225724, 87225730, 87225729          |
| GPR55                                             | antagonist                                                                                                                                                                                                                                                                                                                                                  | 87225762, 87225747, 87225750          |
| GPR7                                              | antagonist                                                                                                                                                                                                                                                                                                                                                  | 96021160                              |
| KOR                                               | agonist                                                                                                                                                                                                                                                                                                                                                     | 87334039, 87218782                    |
| KOR                                               | antagonist                                                                                                                                                                                                                                                                                                                                                  | 87218794, 88442997                    |
| M1                                                | NAM                                                                                                                                                                                                                                                                                                                                                         | 4248988                               |
| M1                                                | PAM                                                                                                                                                                                                                                                                                                                                                         | 56353039, 99350544, 8528605, 85756541 |
| M4                                                | PAM                                                                                                                                                                                                                                                                                                                                                         | 85163688                              |
| M5                                                | PAM                                                                                                                                                                                                                                                                                                                                                         | 85285486                              |
| mGluR4                                            | PAM                                                                                                                                                                                                                                                                                                                                                         | 85240643                              |
| NPSR                                              | antagonist                                                                                                                                                                                                                                                                                                                                                  | 56431681, 56431665, 87796314          |
| NPY-Y2                                            | antagonist                                                                                                                                                                                                                                                                                                                                                  | 22413249, 4242079, 17413392, 17507305 |
| S1P1                                              | agonist                                                                                                                                                                                                                                                                                                                                                     | 4258673                               |
| S1P1                                              | antagonist                                                                                                                                                                                                                                                                                                                                                  | 24257742                              |
| S1P2                                              | agonist                                                                                                                                                                                                                                                                                                                                                     | 46371210                              |
| S1P3                                              | agonist                                                                                                                                                                                                                                                                                                                                                     | 3714904, 7967985, 864271, 7977380     |
| S1P4                                              | agonist                                                                                                                                                                                                                                                                                                                                                     | 87544119                              |
| S1P4                                              | antagonist                                                                                                                                                                                                                                                                                                                                                  | 87357351                              |
| TSHR                                              | agonist                                                                                                                                                                                                                                                                                                                                                     | 3714076, 26755506                     |
| RGS: RGS4,RGS7,RGS8,RGS12,<br>RGS16, RGS18, RGS19 | 29 NIH MLP BioAssays;<br>5289compounds are RGS4 active,<br>854compounds are RGS7 active,<br>786compounds are RGS8 active,<br>1018 compounds are RGS12 active,<br>875 compounds are RGS16 active,<br>2compounds are RGS18 active,<br>111 compounds are RGS19 active,<br>No probes were declared.(Source: PubChem Target-centric BioActivity Service search ) |                                       |

**Supplementary Table 8.** A list of screening campaigns targeting GPCRs, G proteins or RGS. Note, some campaigns were combined for analysis and some are not yet annotated.

| Campaign    | Screening Campaign Name                                                          |
|-------------|----------------------------------------------------------------------------------|
| Campaign 1  | Agonists of Neurotensin Receptor type 1 (NTR1)                                   |
| Campaign 2  | Agonists of the 5-Hydroxytryptamine Receptor Subtype 1A (5-HT1A)                 |
| Campaign 3  | Agonists of the 5-Hydroxytryptamine Receptor Subtype 1E (5-HT1E)                 |
| Campaign 4  | Agonists of the Galanin receptor 2 (Gal2)                                        |
| Campaign 5  | Agonists of the Neuropeptide Y receptor Y1 (NY1R)                                |
| Campaign 6  | Agonists of the Neuropeptide Y receptor Y2 (NY2R)                                |
| Campaign 7  | Agonists of the Oxytocin Receptor (OT)                                           |
| Campaign 8  | Agonists of the Relaxin Receptor RXFP1                                           |
| Campaign 9  | Agonists of the Sphingosine 1-Phosphate Receptor 1 (S1P1)                        |
| Campaign 10 | Agonists of the Sphingosine 1-Phosphate Receptor 2 (S1P2)                        |
| Campaign 11 | Agonists of the Sphingosine 1-Phosphate Receptor 3 (S1P3)                        |
| Campaign 12 | Agonists of the Sphingosine 1-Phosphate Receptor 4 (S1P4)                        |
| Campaign 13 | Allosteric ligands of the Thyrotropin-releasing hormone receptor, agonist        |
| Campaign 14 | Allosteric modulators of D1 Dopamine Receptors                                   |
| Campaign 15 | Antagonists of the 5-Hydroxytryptamine Receptor Subtype 1E (5-HT1E)              |
| Campaign 16 | Antagonists of the Chemokine C-C motif receptor 6, CCR6                          |
| Campaign 17 | Antagonists of the Formyl Peptide Receptor 1 (FPR1)                              |
| Campaign 18 | Antagonists of the Formyl Peptide Receptor 2 (FPR2)                              |
| Campaign 19 | Antagonists of the G protein coupled receptor 7 (GPR7)                           |
| Campaign 20 | Antagonists of the Galanin receptor 2 (Gal2)                                     |
| Campaign 21 | Antagonists of the M1 muscarinic receptor                                        |
| Campaign 22 | Antagonists of the Neuropeptide S Receptor                                       |
| Campaign 23 | Antagonists of the Neuropeptide Y receptor Y1 (NY1R)                             |
| Campaign 24 | Antagonists of the Neuropeptide Y receptor Y2 (NY2R)                             |
| Campaign 25 | Antagonists of the Sphingosine 1-Phosphate Receptor 1 (S1P1)                     |
| Campaign 26 | Antagonists of the Sphingosine 1-Phosphate Receptor 2 (S1P2)                     |
| Campaign 27 | Antagonists of the Sphingosine 1-Phosphate Receptor 3 (S1P3)                     |
| Campaign 28 | Antagonists of the Sphingosine 1-Phosphate Receptor 4 (S1P4)                     |
| Campaign 29 | Compounds affecting Ras and related GTPases                                      |
| Campaign 30 | Compounds affecting the NFAT signaling pathway                                   |
| Campaign 31 | Compounds binding the Estrogen Receptors                                         |
| Campaign 32 | Compounds binding the GPR35, antagonists                                         |
| Campaign 33 | Compounds binding the GPR55, agonists                                            |
| Campaign 34 | Compounds binding the GPR55, antagonists                                         |
| Campaign 35 | Compounds interacting with beta2 adrenergic receptor                             |
| Campaign 36 | GPCR-mediated thallium flux through GIRK channels                                |
| Campaign 37 | Inhibitors of platelet dense granule release                                     |
| Campaign 38 | Inhibitors of RGS12 GoLoco Motif Activity                                        |
| Campaign 39 | Late stage dose response (S1P4 agonists in triplicate)                           |
| Campaign 40 | Late stage dose response counterscreen (Cytotoxicity in quadruplicate)           |
| Campaign 41 | Late stage dose response counterscreen (inhibition by S1P4-selective antagonist) |
| Campaign 42 | Late stage dose response counterscreen (S1P1 agonists in triplicate)             |
| Campaign 43 | Late stage dose response counterscreen (S1P2 agonists in triplicate)             |
| Campaign 44 | Late stage dose response counterscreen (S1P3 agonists in triplicate)             |
| Campaign 45 | Late stage dose response counterscreen (S1P5 agonists in triplicate)             |
| Campaign 46 | Late stage counterscreen panel assay (Ricerca hit profiling CYP450)              |
| Campaign 47 | Ligands of D1 Dopamine Receptors, allosteric agonists                            |
| Campaign 48 | Ligands of D1 Dopamine Receptors, allosteric antagonists                         |
| Campaign 49 | Ligands of D1 Dopamine Receptors, allosteric potentiators                        |
| Campaign 50 | Ligands of D2 Dopamine Receptors, allosteric agonists                            |
| Campaign 51 | Ligands of D2 Dopamine Receptors, allosteric antagonists                         |
| Campaign 52 | Ligands of D2 Dopamine Receptors, allosteric potentiators                        |
| Campaign 53 | Ligands of the Thyroid Stimulating Hormone receptor (TSH)                        |
| Campaign 54 | Ligands of the Thyroid Stimulating Hormone receptor (TSH), inverse agonist       |
| Campaign 55 | Modulators of the metabotropic Glutamate receptor 4 (mGlu4)                      |
| Campaign 56 | Modulators of the metabotropic Glutamate receptor 8 (mGlu8)                      |
| Campaign 57 | Modulators of the prostaglandin E2 receptor subtype EP2                          |
| Campaign 58 | Novel allosteric agonists of the M1 muscarinic receptor                          |
| Campaign 59 | Novel allosteric antagonists of the M1 muscarinic receptor                       |
| Campaign 60 | Novel allosteric modulators of the M1 muscarinic receptor                        |
| Campaign 61 | Novel allosteric modulators of the M4 muscarinic receptor                        |
| Campaign 62 | Novel allosteric modulators of the M5 muscarinic receptor                        |
| Campaign 63 | Orexin 1 receptor (OX1) antagonists                                              |
| Campaign 64 | Positive allosteric modulators of the M1 muscarinic receptor                     |
| Campaign 65 | Potentiators of Oxytocin Receptor (OT)                                           |
| Campaign 66 | Selective ligands of the kappa opioid receptor                                   |

|             |                                                                          |
|-------------|--------------------------------------------------------------------------|
| Campaign 67 | Selective ligands of the kappa opioid receptor, agonists                 |
| Campaign 68 | Selective ligands of the kappa opioid receptor, agonists and antagonists |
| Campaign 69 | Selective ligands of the kappa opioid receptor, antagonists              |
| Campaign 70 | Small molecule agonists of the apelin receptor (APJ)                     |
| Campaign 71 | Small molecule antagonists of the apelin receptor (APJ)                  |
| Campaign 72 | Small molecule regulators of the RGS family protein interactions         |
| Campaign 73 | Small molecule regulators of the RGS4 protein                            |

---

Supplementary Table 9. Table 3 expanded to show compound structures.

| Classification                                        | SID       | Target Symbol | SID Efficacy         | Potency ( $\mu\text{M}$ ) | Structure                                                                             |
|-------------------------------------------------------|-----------|---------------|----------------------|---------------------------|---------------------------------------------------------------------------------------|
| Functionally Active                                   | 856021    | 5-HT(1A)      | Agonist              | $\text{EC}_{50}=0.018$    | 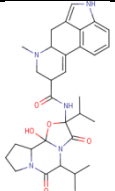   |
|                                                       | 22409370  | S1P4R         | Antagonist           | $\text{IC}_{50}=0.168$    |    |
|                                                       | 85285486  | M5R           | Allosteric modulator | $\text{EC}_{50}=1.161$    |    |
| Target Selective<br>(* , probe)                       | 24428139* | FPR1          | Antagonist           | $K_i=0.3$                 |    |
|                                                       | 22413249* | NPY-Y2R       | Antagonist           | $\text{IC}_{50}=3.917$    |    |
|                                                       | 4258673*  | S1P1R         | Agonist              | $\text{AC}_{50}=0.207$    |   |
| Unselective OR<br>Artifact<br>(suspected promiscuous) | 17415263  | M1R           | Antagonist           | $\text{AC}_{50}=3.9811$   |  |
|                                                       | 85200865  | AVPR1A        | Agonist              | $\text{EC}_{50}=2.325$    |  |
|                                                       | 11532956  | RXFP2         | Agonist              | $\text{AC}_{50}=0.9742$   |  |

**SupplementaryTable 10.** Promiscuous compounds identified in the GPCR ontology-based flow chart analysis.

| SID                                           | Screening Campaign Target                                             | PubChem Outcome                                        |        |
|-----------------------------------------------|-----------------------------------------------------------------------|--------------------------------------------------------|--------|
| 14729216                                      | Angiotensin II receptor type 1 (AGTR-1, AT1)                          | Active                                                 |        |
|                                               | Apelin receptor (APJ), antagonists                                    | Active                                                 |        |
|                                               | Galanin receptor type 2                                               | Active                                                 |        |
|                                               | Kappa opioid receptor (kappa)                                         | Active                                                 |        |
|                                               | Muscarinic M1 receptor (M1)                                           | Active                                                 |        |
|                                               | Neuropeptide S (NPS) receptor                                         | Active                                                 |        |
|                                               | Neuropeptide Y Y2 (NPY-Y2) receptor, antagonists                      | Active                                                 |        |
|                                               | Neuropeptides B/W receptor 1 (NPBWR1)                                 | Active                                                 |        |
|                                               | Sphingosine 1-phosphate (S1P) receptor 1 (S1P1), antagonists          | Active                                                 |        |
|                                               | Sphingosine 1-phosphate (S1P) receptor 2 (S1P2), antagonists          | Active                                                 |        |
|                                               | Sphingosine 1-phosphate (S1P) receptor 4 (S1P4), antagonists          | Active                                                 |        |
|                                               | Apelin receptor (APJ), agonists                                       | Inactive                                               |        |
|                                               | Arginine vasopressin receptor 1A, AVPR1A, V1A                         | Inactive                                               |        |
|                                               | Dopamine D2 receptor                                                  | Inactive                                               |        |
|                                               | G alpha q                                                             | Inactive                                               |        |
|                                               | Neuropeptide Y Y1 (NPY-Y1) receptor, agonists                         | Inactive                                               |        |
|                                               | Neuropeptide Y Y1 (NPY-Y1) receptor, antagonists                      | Inactive                                               |        |
|                                               | Neuropeptide Y Y2 (NPY-Y2) receptor, agonists                         | Inactive                                               |        |
|                                               | Neurotensin receptor 1, NTSR1                                         | Inactive                                               |        |
|                                               | Oxytocin receptor (OT)                                                | Inactive                                               |        |
|                                               | Prostaglandin E receptor 2 (subtype EP2), PTGER2                      | Inactive                                               |        |
|                                               | Ras-related C3 botulinum toxin substrate 1 (Rac1)                     | Inactive                                               |        |
|                                               | Ras-related C3 botulinum toxin substrate 1 activated mutant (Rac_ACT) | Inactive                                               |        |
|                                               | Regulators of G protein signaling 16 (RGS16)                          | Inactive                                               |        |
|                                               | Regulators of G protein signaling 4 (RGS4)                            | Inactive                                               |        |
|                                               | Regulators of G protein signaling 7 (RGS7)                            | Inactive                                               |        |
|                                               | Regulators of G protein signaling 8 (RGS8)                            | Inactive                                               |        |
|                                               | Sphingosine 1-phosphate (S1P) receptor 2 (S1P2), agonists             | Inactive                                               |        |
|                                               | Sphingosine 1-phosphate (S1P) receptor 4 (S1P4), agonists             | Inactive                                               |        |
|                                               | Thyrotropin-releasing hormone receptor (TRH1)                         | Inactive                                               |        |
|                                               | 49732444                                                              | Arginine vasopressin receptor 1B, AVPR1B, V1B          | Active |
|                                               |                                                                       | Relaxin/insulin-like family peptide receptor 1 (RXFP1) | Active |
|                                               |                                                                       | Relaxin/insulin-like family peptide receptor 2 (RXFP2) | Active |
| Apelin receptor (APJ)                         |                                                                       | Inactive                                               |        |
| C-C chemokine receptor type 6 (CCR6)          |                                                                       | Inactive                                               |        |
| Neuropeptides B/W receptor 1 (NPBWR1)         |                                                                       | Inactive                                               |        |
| Neurotensin receptor 1, NTSR1                 |                                                                       | Inactive                                               |        |
| Thyrotropin-releasing hormone receptor (TRH1) | Inactive                                                              |                                                        |        |
| 49649489                                      | Arginine vasopressin receptor 1B, AVPR1B, V1B                         | Active                                                 |        |
|                                               | Relaxin/insulin-like family peptide receptor 1 (RXFP1)                | Active                                                 |        |
|                                               | Relaxin/insulin-like family peptide receptor 2 (RXFP2)                | Active                                                 |        |
|                                               | Apelin receptor (APJ)                                                 | Inactive                                               |        |
|                                               | C-C chemokine receptor type 6 (CCR6)                                  | Inactive                                               |        |
|                                               | Dopamine D2 receptor                                                  | Inactive                                               |        |
|                                               | Neuropeptides B/W receptor 1 (NPBWR1)                                 | Inactive                                               |        |
| Thyrotropin-releasing hormone receptor (TRH1) | Inactive                                                              |                                                        |        |
| 49827544                                      | Arginine vasopressin receptor 1A, AVPR1A, V1A                         | Active                                                 |        |
|                                               | G alpha q                                                             | Active                                                 |        |
|                                               | Orexin receptor type 1 (OX1)                                          | Active                                                 |        |
|                                               | Oxytocin receptor (OT)                                                | Active                                                 |        |
|                                               | Apelin receptor (APJ)                                                 | Inactive                                               |        |
|                                               | C-C chemokine receptor type 6 (CCR6)                                  | Inactive                                               |        |
|                                               | Dopamine D2 receptor                                                  | Inactive                                               |        |
|                                               | Neuropeptides B/W receptor 1 (NPBWR1)                                 | Inactive                                               |        |
|                                               | Neurotensin receptor 1, NTSR1                                         | Inactive                                               |        |
| Thyrotropin-releasing hormone receptor (TRH1) | Inactive                                                              |                                                        |        |
| 49679344                                      | Arginine vasopressin receptor 1B, AVPR1B, V1B                         | Active                                                 |        |
|                                               | Relaxin/insulin-like family peptide receptor 1 (RXFP1)                | Active                                                 |        |
|                                               | Relaxin/insulin-like family peptide receptor 2 (RXFP2)                | Active                                                 |        |
|                                               | Apelin receptor (APJ)                                                 | Inactive                                               |        |
|                                               | C-C chemokine receptor type 6 (CCR6)                                  | Inactive                                               |        |
|                                               | Dopamine D2 receptor                                                  | Inactive                                               |        |
|                                               | Neuropeptides B/W receptor 1 (NPBWR1)                                 | Inactive                                               |        |
|                                               | Neurotensin receptor 1, NTSR1                                         | Inactive                                               |        |
| Thyrotropin-releasing hormone receptor (TRH1) | Inactive                                                              |                                                        |        |



**Supplementary Table 11.** Global selective compounds identified in the GPCR ontology-based flow chart analysis.

| SID                                                                   | Screening Campaign Target                                             | PubChem Outcome                                                    |        |
|-----------------------------------------------------------------------|-----------------------------------------------------------------------|--------------------------------------------------------------------|--------|
| 4244225                                                               | 5-hydroxytryptamine (serotonin) receptor 1E (5HT1E) agonists          | Active                                                             |        |
|                                                                       | Regulators of G protein signaling 7 (RGS7)                            | Active                                                             |        |
|                                                                       | Regulators of G protein signaling 4 (RGS4)                            | Active                                                             |        |
|                                                                       | Dopamine D2 receptor, allosteric antagonists                          | Active                                                             |        |
|                                                                       | 5-hydroxytryptamine (serotonin) receptor 1A (5HT1A)                   | Inactive                                                           |        |
|                                                                       | 5-hydroxytryptamine (serotonin) receptor 1E (5HT1E) antagonist        | Inactive                                                           |        |
|                                                                       | Apelin receptor (APJ)                                                 | Inactive                                                           |        |
|                                                                       | Arginine vasopressin receptor 1A, AVPR1A, V1A                         | Inactive                                                           |        |
|                                                                       | Formyl peptide receptor 1 (FPR1)                                      | Inactive                                                           |        |
|                                                                       | Formyl peptide receptor 2 (FPR2)                                      | Inactive                                                           |        |
|                                                                       | G alpha q                                                             | Inactive                                                           |        |
|                                                                       | Galanin receptor type 2                                               | Inactive                                                           |        |
|                                                                       | Neuropeptide Y Y1 (NPY-Y1) receptor                                   | Inactive                                                           |        |
|                                                                       | Neuropeptide Y Y2 (NPY-Y2) receptor                                   | Inactive                                                           |        |
|                                                                       | Neuropeptides B/W receptor 1 (NPBWR1)                                 | Inactive                                                           |        |
|                                                                       | Neurotensin receptor 1, NTSR1                                         | Inactive                                                           |        |
|                                                                       | Orexin receptor type 1 (OX1)                                          | Inactive                                                           |        |
|                                                                       | Oxytocin receptor (OT)                                                | Inactive                                                           |        |
|                                                                       | Prostaglandin E receptor 2 (subtype EP2), PTGER2                      | Inactive                                                           |        |
|                                                                       | Ras-related C3 botulinum toxin substrate 1 (Rac1)                     | Inactive                                                           |        |
|                                                                       | Ras-related C3 botulinum toxin substrate 1 activated mutant (Rac_ACT) | Inactive                                                           |        |
|                                                                       | Regulators of G protein signaling 16 (RGS16)                          | Inactive                                                           |        |
|                                                                       | Regulators of G protein signaling 19 (RGS19)                          | Inactive                                                           |        |
|                                                                       | Regulators of G protein signaling 4 (RGS4)                            | Inactive                                                           |        |
|                                                                       | Regulators of G protein signaling 8 (RGS8)                            | Inactive                                                           |        |
|                                                                       | Sphingosine 1-phosphate (S1P) receptor 1 (S1P1)                       | Inactive                                                           |        |
|                                                                       | Sphingosine 1-phosphate (S1P) receptor 2 (S1P2)                       | Inactive                                                           |        |
|                                                                       | Sphingosine 1-phosphate (S1P) receptor 3 (S1P3)                       | Inactive                                                           |        |
|                                                                       | Sphingosine 1-phosphate (S1P) receptor 4 (S1P4)                       | Inactive                                                           |        |
|                                                                       | Thyrotropin-releasing hormone receptor (TRH1)                         | Inactive                                                           |        |
|                                                                       | 4251800                                                               | 5-hydroxytryptamine (serotonin) receptor 1E (5HT1E), agonists      | Active |
|                                                                       |                                                                       | Neuropeptides B/W receptor 1 (NPBWR1)                              | Active |
|                                                                       |                                                                       | Neuropeptide S (NPS) receptor                                      | Active |
| Oxytocin receptor (OT), potentiators                                  |                                                                       | Active                                                             |        |
| 5-hydroxytryptamine (serotonin) receptor 1A (5HT1A)                   |                                                                       | Inactive                                                           |        |
| 5-hydroxytryptamine (serotonin) receptor 1E (5HT1E), agonists         |                                                                       | Inactive                                                           |        |
| Apelin receptor (APJ)                                                 |                                                                       | Inactive                                                           |        |
| Arginine vasopressin receptor 1A, AVPR1A, V1A                         |                                                                       | Inactive                                                           |        |
| C-C chemokine receptor type 6 (CCR6)                                  |                                                                       | Inactive                                                           |        |
| Dopamine D2 receptor                                                  |                                                                       | Inactive                                                           |        |
| Formyl peptide receptor 1 (FPR1)                                      |                                                                       | Inactive                                                           |        |
| Formyl peptide receptor 2 (FPR2)                                      |                                                                       | Inactive                                                           |        |
| G alpha q                                                             |                                                                       | Inactive                                                           |        |
| Galanin receptor type 2                                               |                                                                       | Inactive                                                           |        |
| Neuropeptide Y Y1 (NPY-Y1) receptor                                   |                                                                       | Inactive                                                           |        |
| Neuropeptide Y Y2 (NPY-Y2) receptor                                   |                                                                       | Inactive                                                           |        |
| Neurotensin receptor 1, NTSR1                                         |                                                                       | Inactive                                                           |        |
| Orexin receptor type 1 (OX1)                                          |                                                                       | Inactive                                                           |        |
| Oxytocin receptor (OT), agonists                                      |                                                                       | Inactive                                                           |        |
| Prostaglandin E receptor 2 (subtype EP2), PTGER2                      |                                                                       | Inactive                                                           |        |
| Ras-related C3 botulinum toxin substrate 1 (Rac1)                     |                                                                       | Inactive                                                           |        |
| Ras-related C3 botulinum toxin substrate 1 activated mutant (Rac_ACT) |                                                                       | Inactive                                                           |        |
| Regulators of G protein signaling 16 (RGS16)                          |                                                                       | Inactive                                                           |        |
| Regulators of G protein signaling 4 (RGS4)                            |                                                                       | Inactive                                                           |        |
| Regulators of G protein signaling 7 (RGS7)                            |                                                                       | Inactive                                                           |        |
| Regulators of G protein signaling 8 (RGS8)                            |                                                                       | Inactive                                                           |        |
| Sphingosine 1-phosphate (S1P) receptor 1 (S1P1)                       |                                                                       | Inactive                                                           |        |
| Sphingosine 1-phosphate (S1P) receptor 2 (S1P2)                       |                                                                       | Inactive                                                           |        |
| Sphingosine 1-phosphate (S1P) receptor 3 (S1P3)                       |                                                                       | Inactive                                                           |        |
| Sphingosine 1-phosphate (S1P) receptor 4 (S1P4)                       |                                                                       | Inactive                                                           |        |
| Thyrotropin-releasing hormone receptor (TRH1)                         |                                                                       | Inactive                                                           |        |
| 7970236                                                               |                                                                       | 5-hydroxytryptamine (serotonin) receptor 1E (5HT1E), agonists      | Active |
|                                                                       |                                                                       | Dopamine D2 receptor, allosteric agonists & allosteric antagonists | Active |
|                                                                       | 5-hydroxytryptamine (serotonin) receptor 1A (5HT1A)                   | Inactive                                                           |        |
|                                                                       | Apelin receptor (APJ)                                                 | Inactive                                                           |        |

|         |                                                                       |          |
|---------|-----------------------------------------------------------------------|----------|
|         | Arginine vasopressin receptor 1A, AVPR1A, V1A                         | Inactive |
|         | C-C chemokine receptor type 6 (CCR6)                                  | Inactive |
|         | Formyl peptide receptor 1 (FPR1)                                      | Inactive |
|         | Formyl peptide receptor 2 (FPR2)                                      | Inactive |
|         | G alpha q                                                             | Inactive |
|         | Galanin receptor type 2                                               | Inactive |
|         | Neuropeptide Y Y1 (NPY-Y1) receptor                                   | Inactive |
|         | Neuropeptide Y Y2 (NPY-Y2) receptor                                   | Inactive |
|         | Neuropeptides B/W receptor 1 (NPBWR1)                                 | Inactive |
|         | Neurotensin receptor 1, NTSR1                                         | Inactive |
|         | Orexin receptor type 1 (OX1)                                          | Inactive |
|         | Oxytocin receptor (OT)                                                | Inactive |
|         | Prostaglandin E receptor 2 (subtype EP2), PTGER2                      | Inactive |
|         | Ras-related C3 botulinum toxin substrate 1 (Rac1)                     | Inactive |
|         | Ras-related C3 botulinum toxin substrate 1 activated mutant (Rac_ACT) | Inactive |
|         | Regulators of G protein signaling 16 (RGS16)                          | Inactive |
|         | Regulators of G protein signaling 4 (RGS4)                            | Inactive |
|         | Regulators of G protein signaling 7 (RGS7)                            | Inactive |
|         | Regulators of G protein signaling 8 (RGS8)                            | Inactive |
|         | Sphingosine 1-phosphate (S1P) receptor 1 (S1P1)                       | Inactive |
|         | Sphingosine 1-phosphate (S1P) receptor 2 (S1P2)                       | Inactive |
|         | Sphingosine 1-phosphate (S1P) receptor 3 (S1P3)                       | Inactive |
|         | Sphingosine 1-phosphate (S1P) receptor 4 (S1P4)                       | Inactive |
|         | Thyrotropin-releasing hormone receptor (TRH1)                         | Inactive |
| 7968332 | 5-hydroxytryptamine (serotonin) receptor 1E (5HT1E), agonists         | Active   |
|         | 5-hydroxytryptamine (serotonin) receptor 1A (5HT1A), agonists         | Inactive |
|         | 5-hydroxytryptamine (serotonin) receptor 1A (5HT1A), antagonists      | Inactive |
|         | 5-hydroxytryptamine (serotonin) receptor 1E (5HT1E), antagonists      | Inactive |
|         | Apelin receptor (APJ)                                                 | Inactive |
|         | Arginine vasopressin receptor 1A, AVPR1A, V1A                         | Inactive |
|         | C-C chemokine receptor type 6 (CCR6)                                  | Inactive |
|         | Dopamine D2 receptor                                                  | Inactive |
|         | Formyl peptide receptor 1 (FPR1)                                      | Inactive |
|         | Formyl peptide receptor 2 (FPR2)                                      | Inactive |
|         | G alpha q                                                             | Inactive |
|         | Galanin receptor type 2                                               | Inactive |
|         | Neuropeptide Y Y1 (NPY-Y1) receptor                                   | Inactive |
|         | Neuropeptide Y Y2 (NPY-Y2) receptor                                   | Inactive |
|         | Neuropeptides B/W receptor 1 (NPBWR1)                                 | Inactive |
|         | Neurotensin receptor 1, NTSR1                                         | Inactive |
|         | Orexin receptor type 1 (OX1)                                          | Inactive |
|         | Oxytocin receptor (OT)                                                | Inactive |
|         | Prostaglandin E receptor 2 (subtype EP2), PTGER2                      | Inactive |
|         | Ras-related C3 botulinum toxin substrate 1 (Rac1)                     | Inactive |
|         | Ras-related C3 botulinum toxin substrate 1 activated mutant (Rac_ACT) | Inactive |
|         | Regulators of G protein signaling 16 (RGS16)                          | Inactive |
|         | Regulators of G protein signaling 4 (RGS4)                            | Inactive |
|         | Regulators of G protein signaling 7 (RGS7)                            | Inactive |
|         | Regulators of G protein signaling 8 (RGS8)                            | Inactive |
|         | Sphingosine 1-phosphate (S1P) receptor 1 (S1P1)                       | Inactive |
|         | Sphingosine 1-phosphate (S1P) receptor 2 (S1P2)                       | Inactive |
|         | Sphingosine 1-phosphate (S1P) receptor 3 (S1P3)                       | Inactive |
|         | Sphingosine 1-phosphate (S1P) receptor 4 (S1P4)                       | Inactive |
|         | Thyrotropin-releasing hormone receptor (TRH1)                         | Inactive |
| 4242629 | 5-hydroxytryptamine (serotonin) receptor 1E (5HT1E), agonists         | Active   |
|         | Dopamine D2 receptor, allosteric antagonists                          | Active   |
|         | 5-hydroxytryptamine (serotonin) receptor 1A (5HT1A), agonists         | Inactive |
|         | 5-hydroxytryptamine (serotonin) receptor 1A (5HT1A), antagonists      | Inactive |
|         | 5-hydroxytryptamine (serotonin) receptor 1E (5HT1E), antagonists      | Inactive |
|         | Apelin receptor (APJ)                                                 | Inactive |
|         | Arginine vasopressin receptor 1A, AVPR1A, V1A                         | Inactive |
|         | C-C chemokine receptor type 6 (CCR6)                                  | Inactive |
|         | Dopamine D2 receptor, allosteric agonists                             | Inactive |
|         | Dopamine D2 receptor, allosteric potentiators                         | Inactive |
|         | Formyl peptide receptor 1 (FPR1)                                      | Inactive |
|         | Formyl peptide receptor 2 (FPR2)                                      | Inactive |
|         | G alpha q                                                             | Inactive |
|         | Galanin receptor type 2                                               | Inactive |
|         | Neuropeptide Y Y1 (NPY-Y1) receptor                                   | Inactive |

|                                                                       |          |
|-----------------------------------------------------------------------|----------|
| Neuropeptide Y Y2 (NPY-Y2) receptor                                   | Inactive |
| Neuropeptides B/W receptor 1 (NPBWR1)                                 | Inactive |
| Neurotensin receptor 1, NTSR1                                         | Inactive |
| Orexin receptor type 1 (OX1)                                          | Inactive |
| Oxytocin receptor (OT)                                                | Inactive |
| Prostaglandin E receptor 2 (subtype EP2), PTGER2                      | Inactive |
| Ras-related C3 botulinum toxin substrate 1 (Rac1)                     | Inactive |
| Ras-related C3 botulinum toxin substrate 1 activated mutant (Rac_ACT) | Inactive |
| Regulators of G protein signaling 16 (RGS16)                          | Inactive |
| Regulators of G protein signaling 4 (RGS4)                            | Inactive |
| Regulators of G protein signaling 7 (RGS7)                            | Inactive |
| Regulators of G protein signaling 8 (RGS8)                            | Inactive |
| Sphingosine 1-phosphate (S1P) receptor 1 (S1P1)                       | Inactive |
| Sphingosine 1-phosphate (S1P) receptor 2 (S1P2)                       | Inactive |
| Sphingosine 1-phosphate (S1P) receptor 3 (S1P3)                       | Inactive |
| Sphingosine 1-phosphate (S1P) receptor 4 (S1P4)                       | Inactive |
| Thyrotropin-releasing hormone receptor (TRH1)                         | Inactive |

---

Supplementary Table 12. Examples of promiscuous, selective, functionally active compound classification across screening campaigns.

| Compound Category  |  | SID      | Structure | # of Campaigns | SID is Assay Active (N) | SID is Active (Idx) | SID is Promiscuous (N) | SID is Promiscuous (Idx) | SID is Selective (N) | SID is Selective (Idx) | SID is Functionally Active (N) | SID is Functionally Active (Idx) |
|--------------------|--|----------|-----------|----------------|-------------------------|---------------------|------------------------|--------------------------|----------------------|------------------------|--------------------------------|----------------------------------|
| Global Promiscuous |  | 14729216 |           | 25             | 39                      | -0.13               | 7                      | 0.43                     | 7                    | -0.43                  | 2                              | 0.00                             |
|                    |  | 49827544 |           | 12             | 15                      | -0.73               | 4                      | 1.00                     | 4                    | -1.00                  | 1                              | -1.00                            |
|                    |  | 49679344 |           | 10             | 12                      | -0.67               | 2                      | 1.00                     | 2                    | -1.00                  | 0                              |                                  |
|                    |  | 49649489 |           | 9              | 11                      | -0.64               | 2                      | 1.00                     | 2                    | -1.00                  | 0                              |                                  |
|                    |  | 49732444 |           | 7              | 10                      | -0.40               | 2                      | 1.00                     | 2                    | -1.00                  | 0                              |                                  |

|                            |          |                                                                                     |    |    |       |   |       |   |       |   |       |
|----------------------------|----------|-------------------------------------------------------------------------------------|----|----|-------|---|-------|---|-------|---|-------|
|                            | 3712888  | 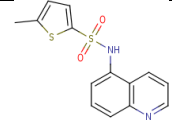   | 31 | 42 | -0.57 | 7 | 0.43  | 7 | -0.43 | 2 | 0.00  |
| Global Selective           | 4244225  |    | 30 | 44 | -0.73 | 4 | -1.00 | 4 | 1.00  | 1 | -1.00 |
|                            | 4251800  |    | 32 | 41 | -0.76 | 4 | -1.00 | 4 | 1.00  | 2 | 0.00  |
|                            | 7970236  |    | 31 | 40 | -0.80 | 4 | -1.00 | 4 | 1.00  | 1 | -1.00 |
|                            | 3714468  |   | 29 | 40 | -0.80 | 4 | -1.00 | 4 | 1.00  | 1 | -1.00 |
|                            | 7966282  |  | 28 | 36 | -0.78 | 5 | -1.00 | 5 | 1.00  | 1 | -1.00 |
| Global Functionally Active | 855989   |  | 28 | 39 | -0.74 | 3 | -1.00 | 3 | 1.00  | 1 | 1.00  |
|                            | 863325   |  | 31 | 37 | -0.89 | 3 | -0.33 | 3 | 0.33  | 2 | 1.00  |
|                            | 24835397 |  | 17 | 25 | -0.76 | 0 |       | 0 |       | 1 | 1.00  |

|          |                                                                                   |    |    |       |   |       |   |       |   |      |
|----------|-----------------------------------------------------------------------------------|----|----|-------|---|-------|---|-------|---|------|
| 24428974 | 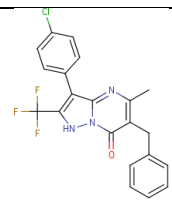 | 1  | 2  | 1.00  | 2 | -1.00 | 2 | 1.00  | 1 | 1.00 |
| 85286051 |  | 1  | 0  |       | 3 | 0.33  | 3 | -0.33 | 1 | 1.00 |
| 24790058 |  | 22 | 29 | -0.86 | 2 | -1.00 | 2 | 1.00  | 2 | 1.00 |
